# Supplementary material
Source: PubMed Central journal article supplement (PMC2593419)
Supplement: NIHMS79436-supplement-Supp_Tab.pdf [file NIHMS79436-supplement-Supp_Tab.pdf]

**Table S1.** No inhibition of xenograft tumorigenesis by sulindac or celecoxib in nude mice injected with SK-UT-1 (low *HMGA1a*) human uterine cancer cells

| Cell line      | Treatment | Tumor #    | Tumor volume (mm <sup>3</sup> ) |       |     |     |     |       |
|----------------|-----------|------------|---------------------------------|-------|-----|-----|-----|-------|
|                |           |            | 1                               | 2     | 3   | 4   | 5   | 6     |
| <b>SK-UT-1</b> |           |            |                                 |       |     |     |     |       |
|                | Control   | 6/6 (100%) | 216                             | 256   | 48  | 256 | 108 | 171.5 |
|                | Sulindac  | 5/6 (83%)  | 48                              | 64    | 256 | 256 | 256 | -     |
|                | Celecoxib | 5/6 (83%)  | 126                             | 220.5 | 108 | 108 | 32  | -     |
